# Supplementary material for: The importance of extracellular vesicle purification for downstream analysis: A comparison of differential centrifugation and size exclusion chromatography for helminth pathogens
Source: PubMed Central journal article supplement (PMC6411213; doi:10.1371/journal.pntd.0007191), 2019-02-27
Supplement: pntd.0007191.s006.pdf [file pntd.0007191.s006.pdf]

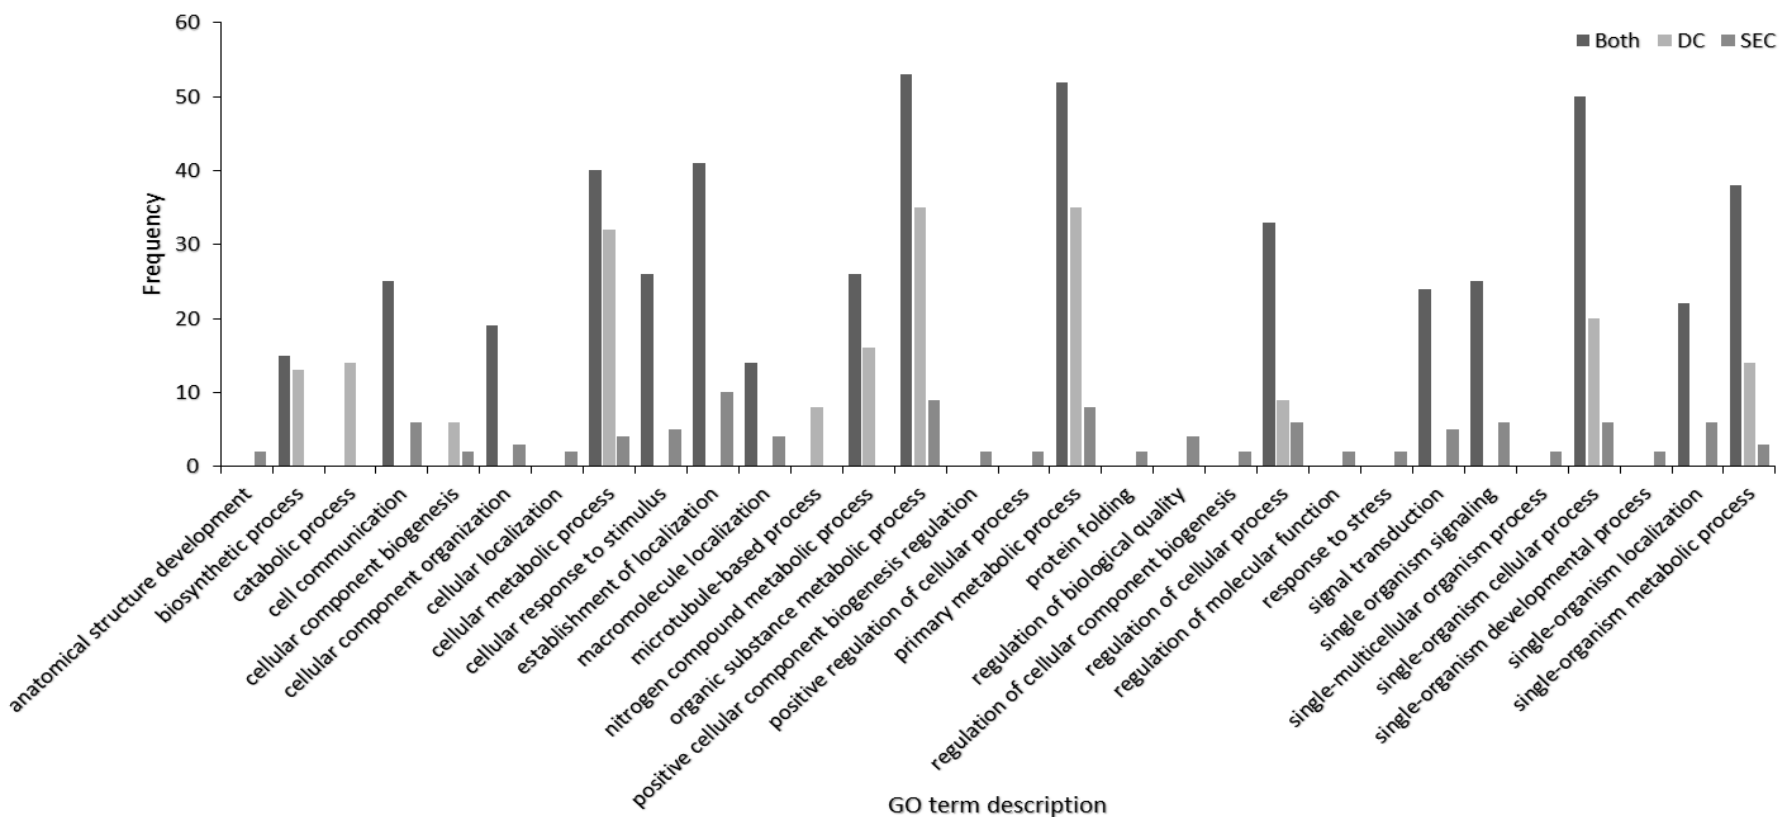

Level 3 Gene ontology descriptions of protein identifications observed in EVs common to both isolation methods, to DC EV samples only and to SEC EV samples only in biological process component functional categories. Data analysed using BLAST2GO (n= 2).

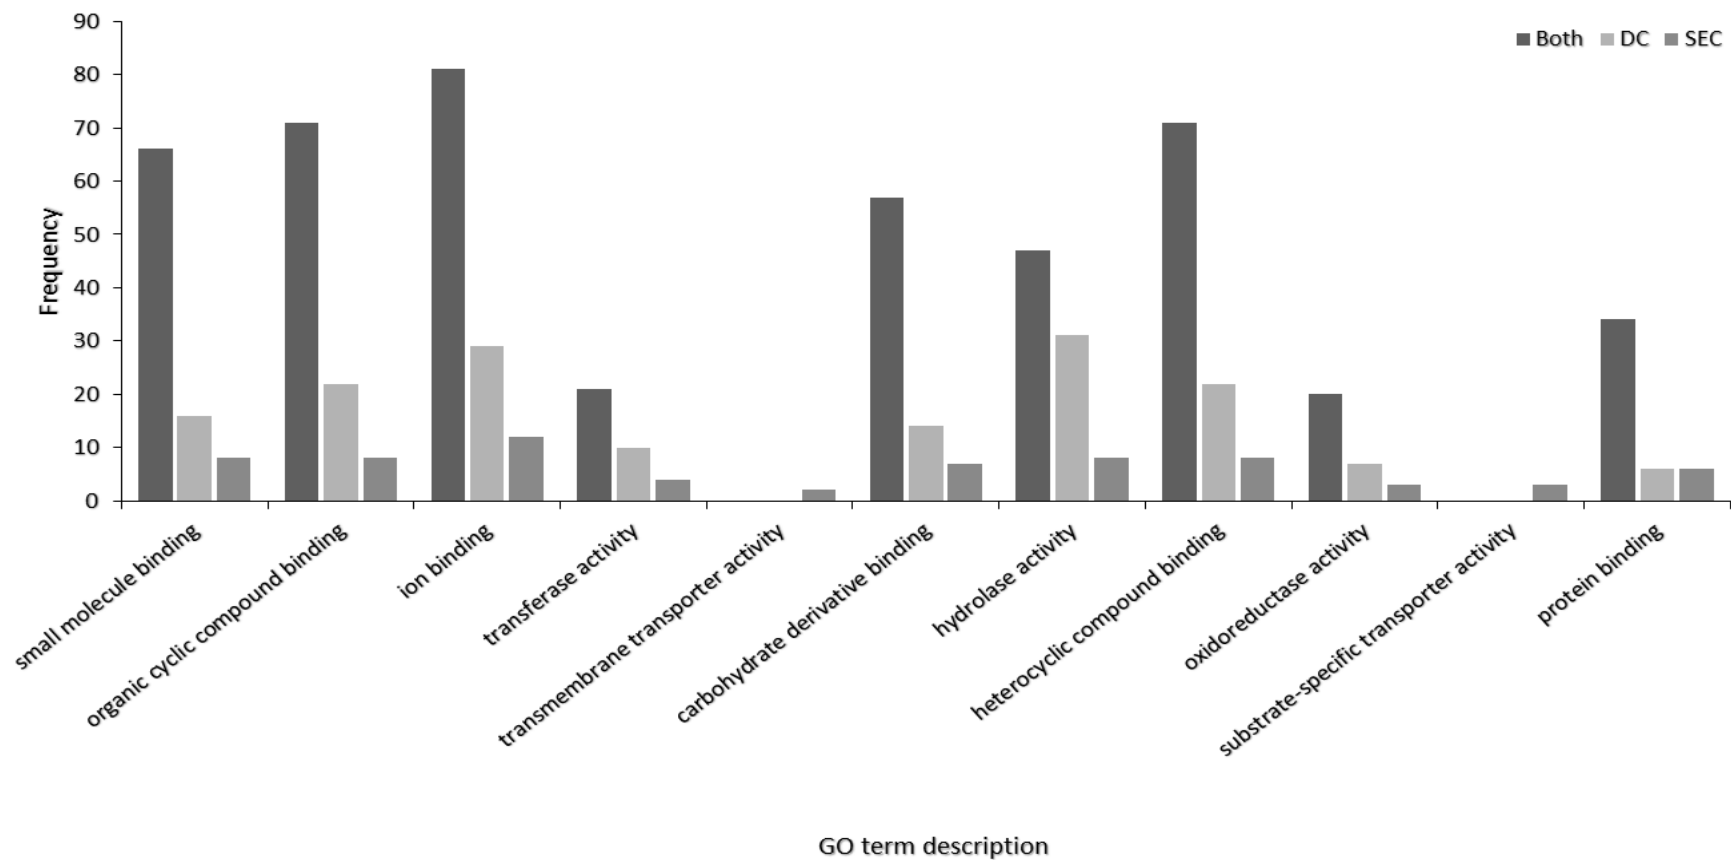

Level 3 Gene ontology descriptions of protein identifications observed in EVs common to both isolation methods, to DC EV samples only and to SEC EV samples only in molecular function functional categories. Data analysed using BLAST2GO (n= 2).

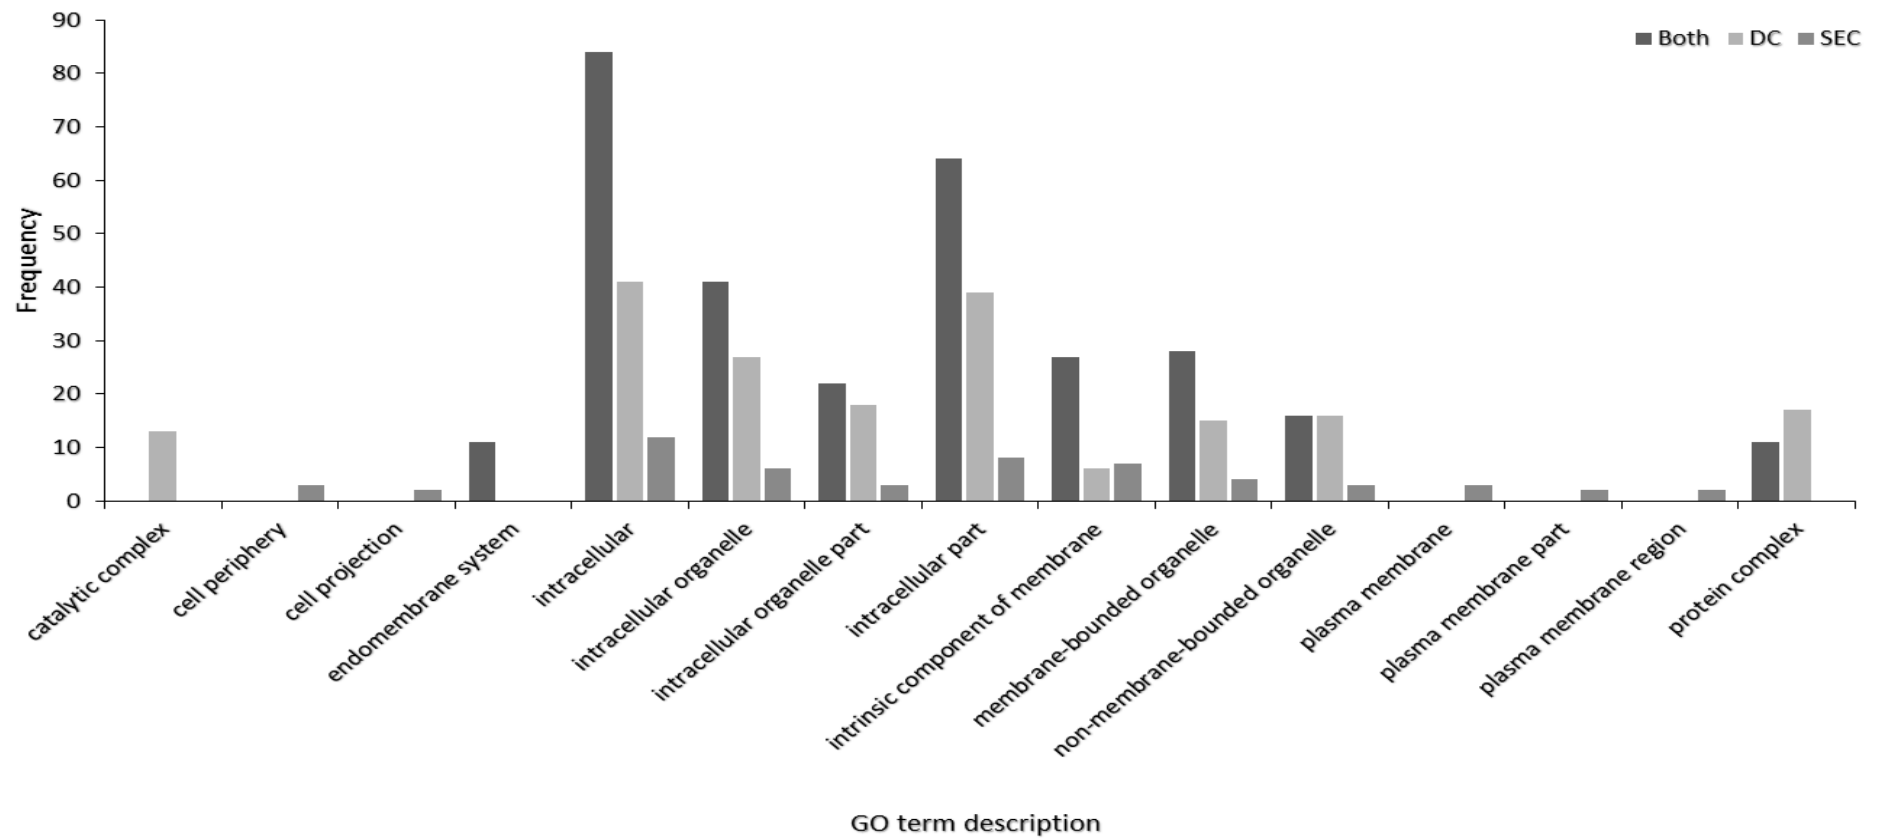

Level 3 Gene ontology descriptions of protein identifications observed in EVs common to both isolation methods, to DC EV samples only and to SEC EV samples only in cellular component functional categories. Data analysed using BLAST2GO (n= 2).
