# Supplementary material for: The importance of extracellular vesicle purification for downstream analysis: A comparison of differential centrifugation and size exclusion chromatography for helminth pathogens
Source: PubMed Central journal article supplement (PMC6411213; doi:10.1371/journal.pntd.0007191), 2019-02-27
Supplement: pntd.0007191.s007.pdf [file pntd.0007191.s007.pdf]

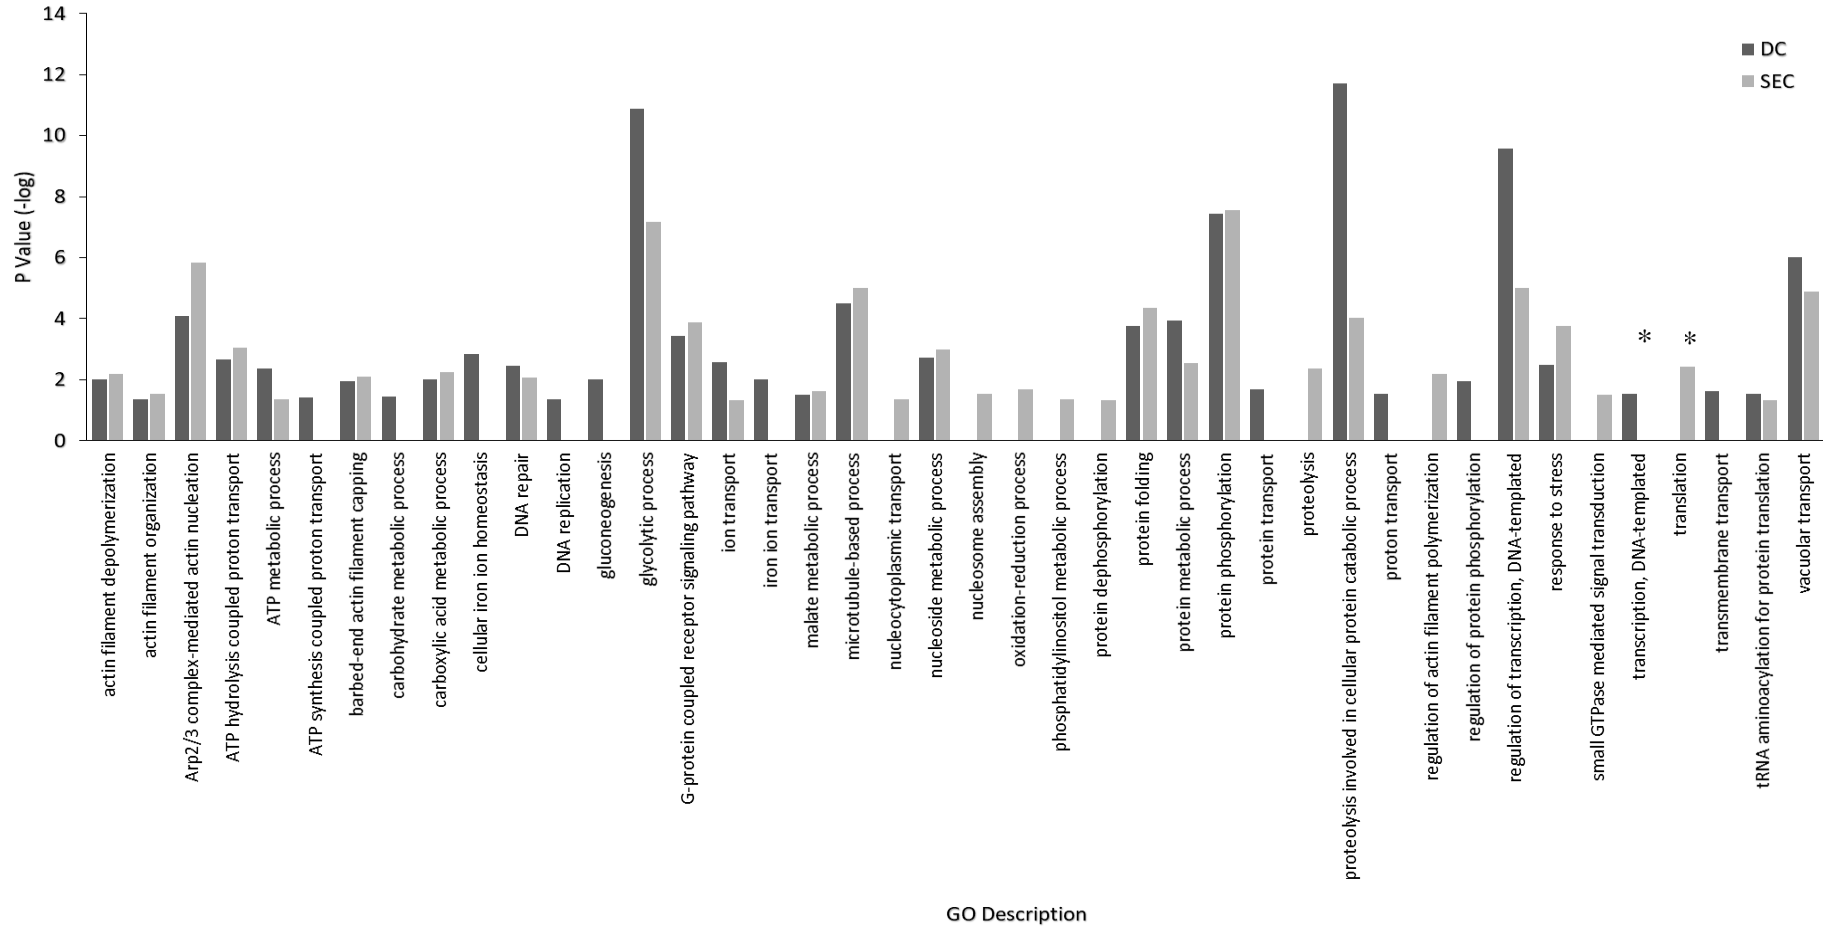

Gene enrichment analysis comparison between SEC and DC *F. hepatica* EV purification methods within biological process categories against the *F. hepatica* genome. Significant processes lower than 0.05 probability, presented using -log transformation were identified by asterisks. Data analysed using GOATOOLS in python software.

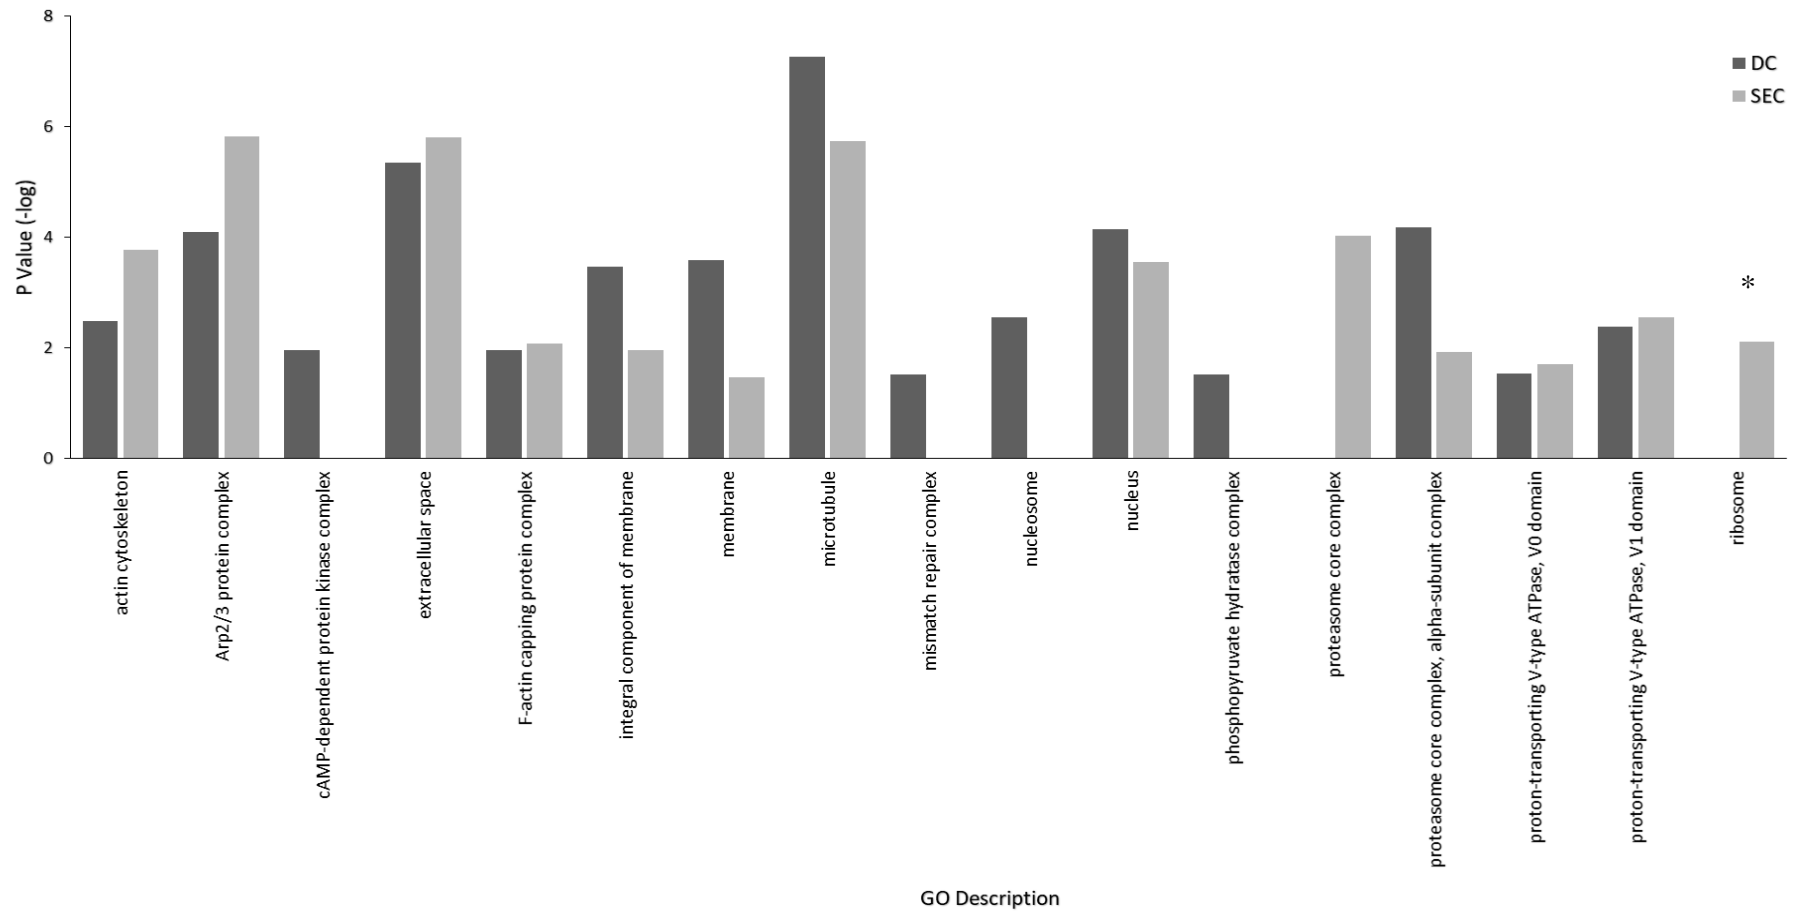

Gene enrichment analysis comparison between SEC and DC purification methods within cellular component categories against the *F. hepatica* genome. Significant processes lower than 0.05 probability, presented using -log transformation were identified by asterisks. Data analysed using GOATOOLS in python software.

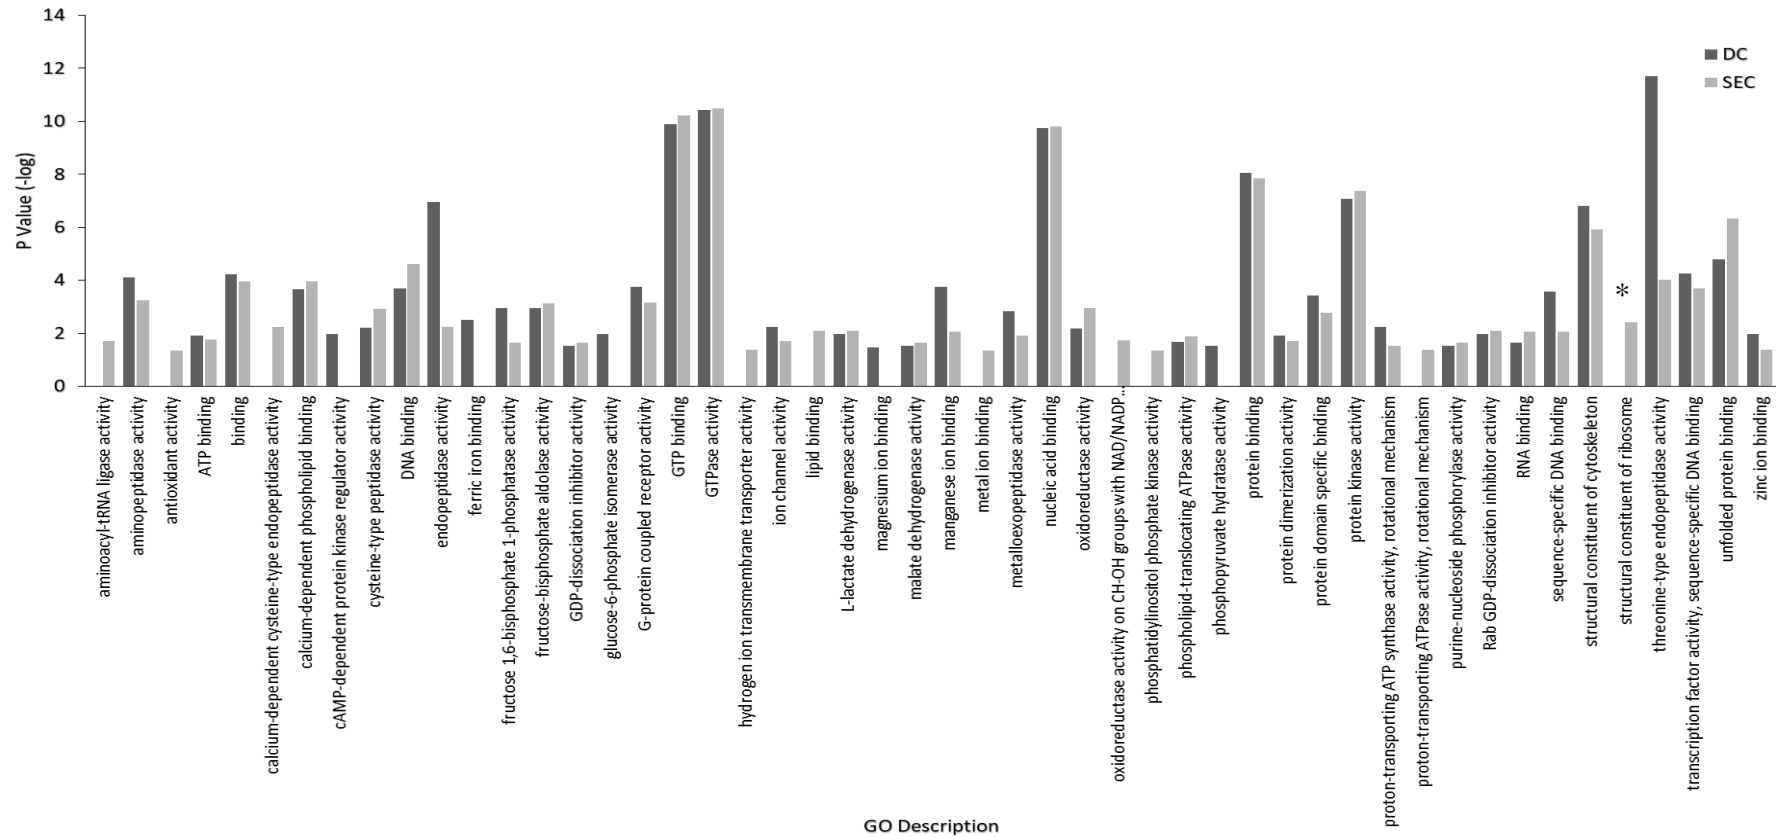

Gene enrichment analysis comparison between SEC and DC purification methods within molecular function categories against the *F. hepatica* genome. Significant processes lower than 0.05 probability, presented using -log transformation were identified by asterisks. Data analysed using GOATOOLS in python software.
